# Supplementary material for: Identification of Bna.IAA7.C05 as allelic gene for dwarf mutant generated from tissue culture in oilseed rape
Source: BMC Plant Biol. 2019 Nov 15;19:500. doi: 10.1186/s12870-019-2094-2 (PMC6857212; doi:10.1186/s12870-019-2094-2)
Supplement: Supplementary file 2 — Additional file 2: Table S2. Primers used in this study. [file 12870_2019_2094_MOESM2_ESM.xlsx]

## Sheet: Table S2
	Table S2.Primers used in this study
	Name		Use
	MIRQ	GTGCAGGGTCCGAGGTATTC	Detect miR169d exrpession
	U6F	TTGGAACGATACAGAGAAGATTAGCA
	U6R	TTGGACCATTTCTCGATTTGTG
	169RTR	GTCGTATCCAGTGCAGGGTCCGAGGTATTCGCACTGGATACGACTAGGCA
	169QF	AGTAGTCATAGCCAAGGATGAC
	AHC5F	GCCAACGAGAATCTGGCAAA	Analyze SNP and expression of IAA7
	AHC5R	CTATTGCCCTATATACCGATC
	BnActinF	TCTGGCATCACACTTTCTACAACGAGC
	BnActinR	CAGGGAACATGGTCGAACCACC
	AHC6F	GACGACGTATTCGCACTCTT	Developed the dCAPs marker
	AHC6R	ATTGTACACATACCTACGGC
	NPTIIF	CTCGAGATGGCTAAAATGAGAATATCA	Positive detection
	NPTIIR	CTCGAGCTAAAACAATTCATCCAGTAA
